# Supplementary material for: Selective maintenance of Drosophila tandemly arranged duplicated genes during evolution
Source: PubMed Central journal article supplement (PMC2646280; doi:10.1186/gb-2008-9-12-r176), 2008-12-16
Supplement: gb-2008-9-12-r176-S2.pdf [file gb-2008-9-12-r176-S2.pdf]

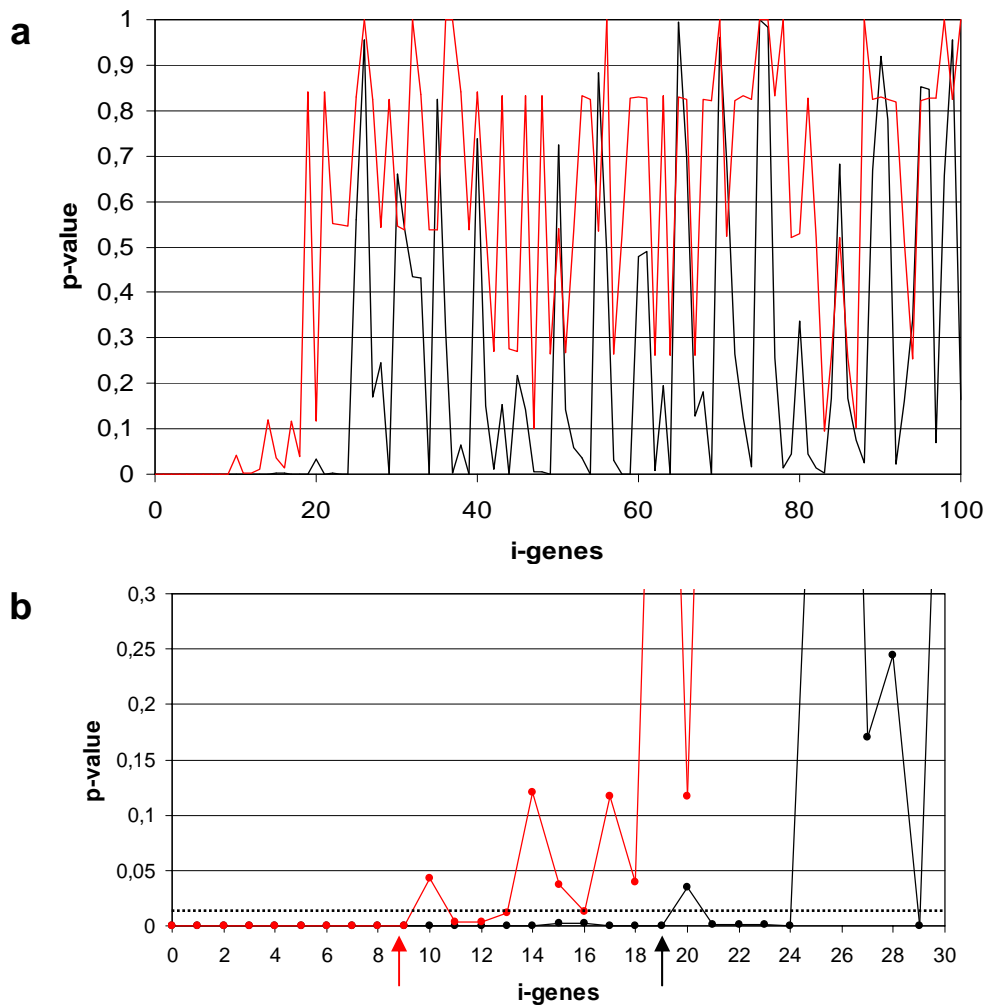

**Additional Figure 2.** Statistical test to define tandemly and dispersed duplicated genes. (a, b) The probability to find the same distribution of TDGs present in the *D. melanogaster* genome in 10,000 randomly reshuffled genomes, plotted against distance in the same chromosome in intervening genes (i-genes). There is high statistical support ( $p < 0,01$ ) to define as tandems those genes that are separated by up to 19 intervening genes (black line). This value is of 9 intervening genes when only the most divergent ( $dS > 4$ ) relations are used (red line). (b) is an enlargement of (a) for values of 0 to 30 intervening genes and p-values of 0 to 0.3. The dotted line indicates a p-value of 0,01.
