# Supplementary material for: Selective maintenance of Drosophila tandemly arranged duplicated genes during evolution
Source: PubMed Central journal article supplement (PMC2646280; doi:10.1186/gb-2008-9-12-r176), 2008-12-16
Supplement: gb-2008-9-12-r176-S3.pdf [file gb-2008-9-12-r176-S3.pdf]

## Additional Table 1

Over and under represented GO categories in TDGs subdivided by dS ranges, compared to dispersed duplicates

| Over represented GO terms<br>0<dS<2                      | Level | adj. p-value |
|----------------------------------------------------------|-------|--------------|
| chromatin assembly                                       | 9     | 3.689584e-79 |
| protein-DNA complex assembly                             | 5     | 3.228133e-71 |
| DNA binding                                              | 4     | 3.555438e-23 |
| trypsin activity                                         | 7     | 9.218969e-08 |
| protein kinase CK2 regulator activity                    | 5     | 9.218969e-08 |
| chymotrypsin activity                                    | 7     | 5.085664e-07 |
| phospholipase A1 activity                                | 8     | 2.726116e-06 |
| meiotic chromosome segregation                           | 9     | 1.871472e-05 |
| cytolysis                                                | 7     | 3.187966e-05 |
| proteolysis                                              | 6     | 4.004771e-05 |
| defense response to Gram-negative bacterium              | 7     | 1.009030e-04 |
| glutathione transferase activity                         | 5     | 2.133344e-04 |
| innate immune response                                   | 5     | 2.385094e-04 |
| female meiosis                                           | 9     | 2.861814e-04 |
| heme binding                                             | 4     | 4.815625e-04 |
| antibacterial humoral response (sensu Protostomia)       | 8     | 9.186038e-04 |
| iron ion binding                                         | 6     | 1.527452e-03 |
| nervous system development                               | 5     | 3.288158e-03 |
| membrane alanyl aminopeptidase activity                  | 8     | 7.316578e-03 |
| lysozyme activity                                        | 6     | 9.700135e-03 |
| neurotransmitter:sodium symporter activity               | 9     | 1.590215e-02 |
| structural constituent of larval cuticle (sensu Insecta) | 5     | 3.029712e-02 |
| monooxygenase activity                                   | 4     | 3.501156e-02 |
| ion channel inhibitor activity                           | 5     | 4.498029e-02 |
| cell wall catabolic process                              | 5     | 4.934063e-02 |

| Under represented GO terms<br>0<dS<2                            | Level | adj. p-value |
|-----------------------------------------------------------------|-------|--------------|
| protein binding                                                 | 3     | 3.088699e-15 |
| RNA binding                                                     | 4     | 1.580750e-05 |
| ubiquitin cycle                                                 | 7     | 5.055034e-05 |
| cell morphogenesis                                              | 5     | 2.217040e-04 |
| negative regulation of cellular process                         | 5     | 2.183296e-03 |
| RNA processing                                                  | 6     | 2.205736e-03 |
| cellular lipid metabolic process                                | 5     | 2.381012e-03 |
| pyrophosphatase activity                                        | 6     | 2.961933e-03 |
| oogenesis (sensu Insecta)                                       | 7     | 2.974796e-03 |
| cation channel activity                                         | 6     | 3.503477e-03 |
| wing morphogenesis                                              | 9     | 3.616954e-03 |
| transferase activity, transferring phosphorus-containing groups | 4     | 3.916381e-03 |
| macromolecule biosynthetic process                              | 5     | 4.222194e-03 |
| cell division                                                   | 3     | 4.440102e-03 |
| regulation of developmental process                             | 4     | 9.382316e-03 |
| regulation of signal transduction                               | 5     | 1.095682e-02 |
| cell adhesion                                                   | 3     | 1.205008e-02 |
| embryonic development                                           | 4     | 1.505409e-02 |
| axis specification                                              | 5     | 1.898928e-02 |
| germ cell development                                           | 6     | 2.305569e-02 |
| muscle development                                              | 6     | 2.305569e-02 |
| establishment of cellular localization                          | 5     | 2.389140e-02 |
| phosphorylation                                                 | 6     | 2.451898e-02 |

|                                                |   |              |
|------------------------------------------------|---|--------------|
| eye morphogenesis (sensu Endopterygota)        | 9 | 2.561319e-02 |
| adenyl nucleotide binding                      | 5 | 3.029712e-02 |
| small conjugating protein ligase activity      | 6 | 3.204147e-02 |
| actin cytoskeleton organization and biogenesis | 7 | 3.508915e-02 |
| phosphoric monoester hydrolase activity        | 6 | 3.511294e-02 |
| protein amino acid dephosphorylation           | 7 | 3.740092e-02 |
| GTPase regulator activity                      | 3 | 3.943621e-02 |
| synaptic transmission                          | 6 | 3.995742e-02 |
| potassium ion transport                        | 8 | 4.774955e-02 |
| biopolymer catabolic process                   | 5 | 4.774955e-02 |
| synaptic vesicle transport                     | 6 | 4.781702e-02 |

| Over represented GO terms<br>2<dS<4                      | Level | adj. p-value |
|----------------------------------------------------------|-------|--------------|
| proteolysis                                              | 6     | 5.570009e-31 |
| trypsin activity                                         | 7     | 1.502997e-13 |
| glutathione transferase activity                         | 5     | 3.630118e-10 |
| oxidoreductase activity, acting on paired donors...      | 5     | 2.968221e-05 |
| chymotrypsin activity                                    | 7     | 4.748059e-05 |
| lipid catabolic process                                  | 5     | 1.446508e-04 |
| chitin metabolic process                                 | 9     | 1.953686e-04 |
| alpha-amylase activity                                   | 7     | 5.660935e-04 |
| phospholipase A1 activity                                | 8     | 8.837874e-04 |
| cytolysis                                                | 7     | 1.104212e-03 |
| defense response to Gram-negative bacterium              | 7     | 1.118183e-03 |
| antibacterial humoral response (sensu Protostomia)       | 8     | 1.186524e-03 |
| heme binding                                             | 4     | 2.035134e-03 |
| pattern binding                                          | 3     | 2.060777e-03 |
| aminoacylase activity                                    | 6     | 3.802387e-03 |
| peptidoglycan catabolic process                          | 7     | 3.859496e-03 |
| larval cuticle biosynthetic process (sensu Insecta)      | 9     | 3.859496e-03 |
| carboxypeptidase A activity                              | 8     | 5.105679e-03 |
| mannose metabolic process                                | 8     | 7.282256e-03 |
| peptide receptor activity, G-protein coupled             | 7     | 1.859617e-02 |
| innate immune response                                   | 5     | 1.960458e-02 |
| elastase activity                                        | 6     | 2.148667e-02 |
| monooxygenase activity                                   | 4     | 2.222876e-02 |
| G-protein coupled receptor protein signaling pathway     | 6     | 2.325188e-02 |
| structural constituent of larval cuticle (sensu Insecta) | 5     | 3.232174e-02 |
| alpha-mannosidase activity                               | 7     | 3.355407e-02 |
| N-acetylmuramoyl-L-alanine amidase activity              | 6     | 3.707965e-02 |
| lysozyme activity                                        | 6     | 4.417100e-02 |
| neurotransmitter:sodium symporter activity               | 9     | 4.977773e-02 |

| Under represented GO terms<br>2<dS<4                   | Level | adj. p-value |
|--------------------------------------------------------|-------|--------------|
| ATP binding                                            | 6     | 8.591315e-17 |
| protein modification                                   | 6     | 4.251236e-06 |
| DNA metabolic process                                  | 5     | 3.544747e-05 |
| regulation of cellular process                         | 4     | 5.156865e-05 |
| RNA binding                                            | 4     | 3.072598e-04 |
| cytoskeleton organization and biogenesis               | 5     | 1.493384e-03 |
| helicase activity                                      | 3     | 6.722672e-03 |
| phosphotransferase activity, alcohol group as acceptor | 5     | 6.722672e-03 |
| macromolecule complex assembly                         | 4     | 7.282256e-03 |

|                                                          |   |              |
|----------------------------------------------------------|---|--------------|
| phosphate metabolic process                              | 5 | 7.658703e-03 |
| synaptic transmission                                    | 6 | 1.395499e-02 |
| chromosome organization and biogenesis (sensu Eukaryota) | 6 | 1.395499e-02 |
| metal ion binding                                        | 4 | 1.585043e-02 |
| DNA binding                                              | 4 | 1.769592e-02 |
| regulation of metabolic process                          | 4 | 1.960458e-02 |
| protein transport                                        | 5 | 2.298740e-02 |
| secretion                                                | 4 | 2.619186e-02 |
| guanyl nucleotide binding                                | 5 | 2.847739e-02 |
| M phase                                                  | 6 | 2.862528e-02 |
| ATPase activity                                          | 8 | 3.025879e-02 |
| RNA metabolic process                                    | 5 | 3.305701e-02 |
| intracellular transport                                  | 6 | 3.405999e-02 |
| oogenesis                                                | 6 | 3.405999e-02 |
| ion transport                                            | 5 | 3.548623e-02 |
| ubiquitin-protein ligase activity                        | 7 | 3.580240e-02 |
| cation binding                                           | 4 | 3.671019e-02 |
| cytoskeletal protein binding                             | 4 | 3.752242e-02 |
| cell morphogenesis                                       | 5 | 3.773052e-02 |
| system development                                       | 4 | 4.839224e-02 |
| cysteine-type peptidase activity                         | 5 | 4.994030e-02 |
| unfolded protein binding                                 | 4 | 4.994030e-02 |

| Over represented GO terms<br>dS>4                   | Level | adj. p-value |
|-----------------------------------------------------|-------|--------------|
| proteolysis                                         | 6     | 2.019770e-41 |
| trypsin activity                                    | 7     | 1.344451e-21 |
| structural constituent of cuticle                   | 3     | 1.099307e-17 |
| chitin metabolic process                            | 9     | 2.410592e-12 |
| oxidoreductase activity, acting on paired donors... | 5     | 1.713796e-06 |
| glutathione transferase activity                    | 5     | 1.713796e-06 |
| chymotrypsin activity                               | 7     | 1.581338e-05 |
| chitin binding                                      | 5     | 1.603990e-05 |
| alpha-amylase activity                              | 7     | 1.338765e-04 |
| regulation of transcription, DNA-dependent          | 8     | 9.491890e-04 |
| protein amino acid phosphorylation                  | 7     | 9.776096e-04 |
| lipid catabolic process                             | 5     | 1.161056e-03 |
| cytolysis                                           | 7     | 2.740274e-03 |
| sensory perception of taste                         | 6     | 4.923385e-03 |
| leg joint morphogenesis                             | 9     | 1.066244e-02 |
| mesoderm formation                                  | 9     | 1.120510e-02 |
| leg disc morphogenesis                              | 8     | 1.546698e-02 |
| fatty acid biosynthetic process                     | 8     | 2.120323e-02 |
| defense response                                    | 3     | 2.417198e-02 |
| periodic partitioning by pair rule gene             | 9     | 2.488814e-02 |
| lymph gland development (sensu Arthropoda)          | 8     | 2.728903e-02 |
| embryonic hemopoiesis                               | 9     | 3.171408e-02 |
| cellular polysaccharide catabolic process           | 7     | 3.554490e-02 |
| N-acetylglucosamine catabolic process               | 9     | 3.631879e-02 |
| head segmentation                                   | 8     | 3.717381e-02 |
| segment specification                               | 7     | 4.307098e-02 |

| Under represented GO terms<br>dS>4 | Level | adj. p-value |
|------------------------------------|-------|--------------|
| GTP binding                        | 6     | 4.983906e-13 |

|                                                          |   |              |
|----------------------------------------------------------|---|--------------|
| RNA binding                                              | 4 | 6.296507e-08 |
| small GTPase mediated signal transduction                | 6 | 3.346444e-06 |
| ubiquitin-protein ligase activity                        | 7 | 5.051943e-05 |
| nucleoside-triphosphatase activity                       | 7 | 5.796976e-05 |
| helicase activity                                        | 3 | 6.639776e-05 |
| vesicle-mediated transport                               | 5 | 1.007566e-04 |
| ATP binding                                              | 6 | 1.030653e-04 |
| phosphoprotein phosphatase activity                      | 7 | 1.499030e-04 |
| calcium ion binding                                      | 5 | 4.620100e-04 |
| nucleotidyltransferase activity                          | 5 | 5.729702e-04 |
| RNA processing                                           | 6 | 7.380614e-04 |
| DNA replication                                          | 6 | 8.628258e-04 |
| M phase                                                  | 6 | 8.628258e-04 |
| cell division                                            | 3 | 1.105000e-03 |
| acyltransferase activity                                 | 6 | 1.396066e-03 |
| protein folding                                          | 6 | 1.742417e-03 |
| ubiquitin cycle                                          | 7 | 1.784334e-03 |
| unfolded protein binding                                 | 4 | 1.869192e-03 |
| structural constituent of ribosome                       | 3 | 3.313543e-03 |
| peptidyl-prolyl cis-trans isomerase activity             | 5 | 3.765359e-03 |
| meiotic cell cycle                                       | 4 | 4.282376e-03 |
| translation factor activity, nucleic acid binding        | 4 | 5.057468e-03 |
| intracellular protein transport                          | 7 | 6.115502e-03 |
| DNA repair                                               | 6 | 7.237108e-03 |
| mitotic cell cycle                                       | 4 | 7.237108e-03 |
| cell morphogenesis                                       | 5 | 7.348334e-03 |
| aminoacyl-tRNA ligase activity                           | 6 | 7.506077e-03 |
| dephosphorylation                                        | 6 | 1.032527e-02 |
| cysteine-type endopeptidase activity                     | 6 | 1.081741e-02 |
| chromosome organization and biogenesis (sensu Eukaryota) | 6 | 1.120510e-02 |
| ribonucleoprotein complex biogenesis and assembly        | 4 | 1.355452e-02 |
| enzyme activator activity                                | 3 | 1.777950e-02 |
| guanyl-nucleotide exchange factor activity               | 4 | 1.777950e-02 |
| voltage-gated ion channel activity                       | 6 | 1.891972e-02 |
| cation transporter activity                              | 4 | 2.020619e-02 |
| tube morphogenesis                                       | 5 | 2.033391e-02 |
| microtubule-based process                                | 6 | 2.120323e-02 |
| response to abiotic stimulus                             | 3 | 2.488814e-02 |
| gametogenesis                                            | 4 | 2.613665e-02 |
| mRNA metabolic process                                   | 6 | 2.649943e-02 |
| DNA packaging                                            | 6 | 2.728903e-02 |
| heterocycle metabolic process                            | 4 | 2.822923e-02 |
| neurotransmitter secretion                               | 8 | 2.838866e-02 |
| protein transporter activity                             | 3 | 3.088443e-02 |
| cofactor metabolic process                               | 4 | 3.283787e-02 |
| tRNA aminoacylation for protein translation              | 9 | 3.446885e-02 |
| protein complex assembly                                 | 5 | 3.666042e-02 |
| membrane invagination                                    | 5 | 3.666042e-02 |
| methyltransferase activity                               | 5 | 4.065713e-02 |
| enzyme binding                                           | 4 | 4.081799e-02 |
| actin binding                                            | 5 | 4.663397e-02 |
| regulation of progression through cell cycle             | 6 | 4.751564e-02 |

Only "Biological Processes" and "Molecular Function" categories were used.

Only non-redundant terms with an adjusted p-value <0.05 are shown.

GO terms related to development and differentiation are highlighted in gray, and those related to transcriptional regulation in blue.
