# Supplementary material for: Selective maintenance of Drosophila tandemly arranged duplicated genes during evolution
Source: PubMed Central journal article supplement (PMC2646280; doi:10.1186/gb-2008-9-12-r176), 2008-12-16
Supplement: gb-2008-9-12-r176-S4.pdf [file gb-2008-9-12-r176-S4.pdf]

## Additional Table 2

Over and under represented GO categories in TDGs compared to dispersed duplicates

| Over represented GO terms                          | Level | adj. p-value |
|----------------------------------------------------|-------|--------------|
| chromatin assembly                                 | 9     | 2.221977e-33 |
| protein-DNA complex assembly                       | 5     | 1.508135e-28 |
| trypsin activity                                   | 7     | 1.139258e-19 |
| structural constituent of cuticle                  | 3     | 3.313147e-18 |
| chitin metabolic process                           | 9     | 5.689048e-09 |
| chitin binding                                     | 5     | 1.622031e-06 |
| oxidoreductase activity, acting on paired donors   | 5     | 3.697661e-06 |
| chymotrypsin activity                              | 7     | 4.921593e-06 |
| glutathione transferase activity                   | 5     | 8.525285e-06 |
| alpha-amylase activity                             | 7     | 7.383382e-05 |
| DNA binding                                        | 4     | 1.000654e-04 |
| heme binding                                       | 4     | 3.001551e-04 |
| membrane alanyl aminopeptidase activity            | 8     | 3.377677e-04 |
| protein amino acid dephosphorylation               | 7     | 3.381429e-04 |
| ATP binding                                        | 6     | 3.839177e-04 |
| protein serine/threonine kinase activity           | 7     | 1.297425e-03 |
| phospholipase A1 activity                          | 8     | 1.642339e-03 |
| protein amino acid phosphorylation                 | 7     | 1.838134e-03 |
| cytolysis                                          | 7     | 2.401718e-03 |
| antibacterial humoral response (sensu Protostomia) | 8     | 3.830717e-03 |
| carboxypeptidase A activity                        | 8     | 8.212148e-03 |
| serine-type endopeptidase inhibitor activity       | 6     | 8.417196e-03 |
| taste receptor activity                            | 7     | 9.012502e-03 |
| iron ion binding                                   | 6     | 1.033587e-02 |
| elastase activity                                  | 6     | 1.177254e-02 |
| protein kinase CK2 regulator activity              | 5     | 1.435802e-02 |
| defense response to Gram-negative bacterium        | 7     | 1.508369e-02 |
| lipid catabolic process                            | 5     | 3.511967e-02 |
| innate immune response                             | 5     | 3.511967e-02 |
| blastoderm segmentation                            | 7     | 3.762113e-02 |
| sensory perception of taste                        | 6     | 3.951579e-02 |
| embryonic heart tube development                   | 7     | 4.459342e-02 |

| Under represented GO terms                   | Level | adj. p-value |
|----------------------------------------------|-------|--------------|
| ubiquitin cycle                              | 7     | 6.688563e-07 |
| helicase activity                            | 3     | 6.069607e-06 |
| nucleoside-triphosphatase activity           | 7     | 2.906415e-05 |
| phosphoprotein phosphatase activity          | 7     | 3.185056e-05 |
| GTP binding                                  | 6     | 3.737752e-05 |
| ubiquitin-protein ligase activity            | 7     | 3.790028e-05 |
| DNA replication                              | 6     | 8.141656e-05 |
| unfolded protein binding                     | 4     | 3.001551e-04 |
| peptidyl-prolyl cis-trans isomerase activity | 5     | 3.927342e-04 |
| cytoskeletal protein binding                 | 4     | 5.022461e-04 |
| tRNA aminoacylation for protein translation  | 9     | 6.232828e-04 |
| aminoacyl-tRNA ligase activity               | 6     | 6.328441e-04 |
| guanyl-nucleotide exchange factor activity   | 4     | 8.398182e-04 |
| cation transport                             | 6     | 1.291837e-03 |
| protein folding                              | 6     | 1.359748e-03 |
| small GTPase mediated signal transduction    | 6     | 1.539161e-03 |
| voltage-gated ion channel activity           | 6     | 1.741152e-03 |

|                                                         |   |              |
|---------------------------------------------------------|---|--------------|
| cysteine-type endopeptidase activity                    | 6 | 2.126571e-03 |
| nucleotidyltransferase activity                         | 5 | 2.207494e-03 |
| neurotransmitter secretion                              | 8 | 2.707491e-03 |
| oogenesis                                               | 6 | 3.093372e-03 |
| enzyme binding                                          | 4 | 3.562912e-03 |
| intracellular protein transport                         | 7 | 4.553116e-03 |
| cell morphogenesis                                      | 5 | 4.734493e-03 |
| acyltransferase activity                                | 6 | 6.405960e-03 |
| GTPase activator activity                               | 4 | 7.948672e-03 |
| oxidoreductase activity, acting on NADH or NADPH        | 4 | 7.948672e-03 |
| regulation of progression through cell cycle            | 6 | 1.143647e-02 |
| calcium ion binding                                     | 5 | 1.177254e-02 |
| regulation of protein metabolic process                 | 5 | 1.261579e-02 |
| synaptic vesicle endocytosis                            | 7 | 1.366790e-02 |
| methyltransferase activity                              | 5 | 1.568451e-02 |
| mitotic cell cycle                                      | 4 | 1.794113e-02 |
| DNA repair                                              | 6 | 1.813100e-02 |
| electron carrier activity                               | 4 | 1.995588e-02 |
| microtubule-based process                               | 6 | 2.590362e-02 |
| regulation of signal transduction                       | 5 | 2.961335e-02 |
| regulation of gene expression, epigenetic               | 4 | 3.350320e-02 |
| heterocycle metabolic process                           | 4 | 3.350320e-02 |
| actin cytoskeleton organization and biogenesis          | 7 | 3.411413e-02 |
| smoothened signaling pathway                            | 6 | 3.411413e-02 |
| regulation of catalytic activity                        | 4 | 3.430634e-02 |
| response to radiation                                   | 4 | 3.430634e-02 |
| tube morphogenesis                                      | 5 | 3.511967e-02 |
| negative regulation of biological process               | 4 | 3.511967e-02 |
| translation elongation factor activity                  | 5 | 3.615328e-02 |
| cofactor metabolic process                              | 4 | 3.939710e-02 |
| dipeptidyl-peptidase and tripeptidyl-peptidase activity | 6 | 4.145648e-02 |
| potassium channel activity                              | 7 | 4.175374e-02 |
| exonuclease activity                                    | 6 | 4.312886e-02 |
| modification-dependent protein catabolic process        | 9 | 4.326510e-02 |
| mRNA processing                                         | 7 | 4.326510e-02 |
| mRNA binding                                            | 5 | 4.541545e-02 |
| cytokinesis                                             | 4 | 4.607470e-02 |
| heat shock protein binding                              | 4 | 4.965611e-02 |
| protein-RNA complex assembly                            | 5 | 4.968409e-02 |
| vesicle organization and biogenesis                     | 5 | 4.968409e-02 |
| protein polymerization                                  | 6 | 4.968409e-02 |

Only “Biological Processes” and “Molecular Function” categories were used.

Only non-redundant terms with an adjusted p-value <0.05 are shown.

GO terms related to development and differentiation are highlighted in gray, and those related to transcriptional regulation in blue.
