# Supplementary material for: Selective maintenance of Drosophila tandemly arranged duplicated genes during evolution
Source: PubMed Central journal article supplement (PMC2646280; doi:10.1186/gb-2008-9-12-r176), 2008-12-16
Supplement: gb-2008-9-12-r176-S5.pdf [file gb-2008-9-12-r176-S5.pdf]

### Additional Table 3

Over and under represented GO categories in conserved TDGs compared to dispersed duplicates

| Over represented GO terms                                   | Level | adj. p-value |
|-------------------------------------------------------------|-------|--------------|
| protein amino acid phosphorylation                          | 7     | 6.357202e-15 |
| trypsin activity                                            | 7     | 1.454860e-11 |
| protein serine/threonine kinase activity                    | 7     | 1.454860e-11 |
| structural constituent of cuticle                           | 3     | 1.352095e-05 |
| cell fate specification                                     | 6     | 9.342389e-05 |
| sequence-specific DNA binding                               | 5     | 1.401508e-04 |
| mesoderm formation                                          | 9     | 1.682214e-04 |
| leg joint morphogenesis                                     | 9     | 3.006959e-04 |
| transcription factor activity                               | 5     | 5.054698e-04 |
| midgut development                                          | 7     | 1.024239e-03 |
| regulation of transcription from RNA polymerase II promoter | 9     | 1.063909e-03 |
| positive regulation of transcription, DNA-dependent         | 9     | 2.450942e-03 |
| leg morphogenesis (sensu Endopterygota)                     | 9     | 3.172980e-03 |
| transcriptional activator activity                          | 3     | 3.432137e-03 |
| cardioblast differentiation                                 | 8     | 4.088958e-03 |
| lymph gland development (sensu Arthropoda)                  | 8     | 4.088958e-03 |
| periodic partitioning by pair rule gene                     | 9     | 5.118436e-03 |
| hemocyte differentiation (sensu Arthropoda)                 | 9     | 5.180785e-03 |
| proteolysis                                                 | 6     | 5.472519e-03 |
| gonadal mesoderm development                                | 8     | 1.185432e-02 |
| head segmentation                                           | 8     | 1.185432e-02 |
| embryonic heart tube development                            | 7     | 1.287970e-02 |
| cuticle biosynthetic process                                | 5     | 1.294956e-02 |
| embryonic hemopoiesis                                       | 9     | 1.419741e-02 |
| regulation of cell differentiation                          | 5     | 2.370797e-02 |
| genital disc development                                    | 7     | 2.434739e-02 |
| frizzled-2 signaling pathway                                | 7     | 2.434739e-02 |
| ATP binding                                                 | 6     | 3.500974e-02 |
| neurotransmitter receptor activity                          | 4     | 4.061725e-02 |
| specification of segmental identity, trunk                  | 9     | 4.070931e-02 |

| Under represented GO terms                     | Level | adj. p-value |
|------------------------------------------------|-------|--------------|
| cellular biosynthetic process                  | 4     | 8.787626e-04 |
| generation of precursor metabolites and energy | 4     | 1.941079e-02 |
| phosphoric monoester hydrolase activity        | 6     | 3.325736e-02 |
| protein transport                              | 5     | 3.672855e-02 |
| cation transport                               | 6     | 4.060544e-02 |
| RNA binding                                    | 4     | 4.061725e-02 |
| protein folding                                | 6     | 4.905897e-02 |

Over and under represented GO categories in conserved TDGs compared to non-conserved TDGs

| Over represented GO terms                                   | Level | adj. p-value |
|-------------------------------------------------------------|-------|--------------|
| protein amino acid phosphorylation                          | 7     | 9.245947e-13 |
| ATP binding                                                 | 6     | 6.788585e-11 |
| protein serine/threonine kinase activity                    | 7     | 1.635591e-09 |
| positive regulation of transcription, DNA-dependent         | 9     | 7.634051e-05 |
| mesoderm formation                                          | 9     | 1.028943e-04 |
| sequence-specific DNA binding                               | 5     | 1.114247e-04 |
| regulation of transcription from RNA polymerase II promoter | 9     | 1.429476e-04 |
| regulation of cell shape                                    | 7     | 2.252113e-04 |
| cell fate specification                                     | 6     | 3.739495e-04 |
| midgut development                                          | 7     | 8.702165e-04 |
| embryonic morphogenesis                                     | 5     | 1.072847e-03 |
| transcription factor activity                               | 5     | 1.233735e-03 |
| negative regulation of cellular process                     | 5     | 1.281967e-03 |
| leg morphogenesis (sensu Endopterygota)                     | 9     | 2.114021e-03 |
| leg joint morphogenesis                                     | 9     | 2.119958e-03 |
| neurotransmitter receptor activity                          | 4     | 5.073172e-03 |
| oogenesis                                                   | 6     | 5.081046e-03 |
| pyrophosphatase activity                                    | 6     | 5.166931e-03 |
| transcriptional activator activity                          | 3     | 5.308557e-03 |
| cardioblast differentiation                                 | 8     | 6.081960e-03 |
| zinc ion binding                                            | 6     | 8.276799e-03 |
| positive regulation of programmed cell death                | 9     | 9.738135e-03 |
| gonadal mesoderm development                                | 8     | 9.738135e-03 |
| muscle development                                          | 6     | 9.780152e-03 |
| axis specification                                          | 5     | 1.036244e-02 |
| embryonic organ development                                 | 6     | 1.037107e-02 |
| regulation of apoptosis                                     | 9     | 1.280132e-02 |
| frizzled-2 signaling pathway                                | 7     | 1.311470e-02 |
| carboxylic acid transporter activity                        | 4     | 1.452508e-02 |
| central nervous system development                          | 6     | 1.678360e-02 |
| cell proliferation                                          | 3     | 1.827000e-02 |
| periodic partitioning by pair rule gene                     | 9     | 2.047112e-02 |
| lymph gland development (sensu Arthropoda)                  | 8     | 2.068215e-02 |
| regulation of cell differentiation                          | 5     | 2.218000e-02 |
| hemocyte differentiation (sensu Arthropoda)                 | 9     | 2.420941e-02 |
| acid-amino acid ligase activity                             | 5     | 2.483924e-02 |
| hydrolase activity, hydrolyzing O-glycosyl compounds        | 5     | 2.739716e-02 |
| cuticle biosynthetic process                                | 5     | 3.000189e-02 |
| actin cytoskeleton organization and biogenesis              | 7     | 3.025900e-02 |
| segment specification                                       | 7     | 3.025900e-02 |
| amino acid transport                                        | 7     | 3.025900e-02 |
| segment polarity determination                              | 9     | 3.068473e-02 |
| germ cell migration                                         | 6     | 3.343154e-02 |
| chromosome condensation                                     | 6     | 3.475204e-02 |
| transcriptional repressor activity                          | 3     | 3.637231e-02 |
| positive regulation of cell growth                          | 9     | 3.972741e-02 |
| wing disc anterior/posterior pattern formation              | 9     | 3.972741e-02 |
| pericardial cell differentiation                            | 8     | 3.972741e-02 |
| genital disc development                                    | 7     | 4.234800e-02 |

| Under represented GO terms                        | Level | adj. p-value |
|---------------------------------------------------|-------|--------------|
| chromatin assembly                                | 9     | 9.972117e-10 |
| protein-DNA complex assembly                      | 5     | 9.106931e-08 |
| iron ion binding                                  | 6     | 9.797565e-04 |
| oxidoreductase activity                           | 3     | 1.233735e-03 |
| sensory perception of chemical stimulus           | 5     | 4.909961e-03 |
| chitin metabolic process                          | 9     | 1.280132e-02 |
| electron transport                                | 5     | 2.477310e-02 |
| metalloexopeptidase activity                      | 6     | 3.434394e-02 |
| transferase activity, transferring hexosyl groups | 5     | 3.747480e-02 |
| cellular catabolic process                        | 4     | 4.182430e-02 |
| carbohydrate binding                              | 3     | 4.335095e-02 |

Only “Biological Processes” and “Molecular Function” categories were used.

Only non-redundant terms with an adjusted p-value <0.05 are shown.

GO terms related to development and differentiation are highlighted in gray, and those related to transcriptional regulation in blue.
