# Supplementary material for: Selective maintenance of Drosophila tandemly arranged duplicated genes during evolution
Source: PubMed Central journal article supplement (PMC2646280; doi:10.1186/gb-2008-9-12-r176), 2008-12-16
Supplement: gb-2008-9-12-r176-S6.pdf [file gb-2008-9-12-r176-S6.pdf]

**Additional Table 4****Number of *D. melanogaster* genes included in each category of selected GO terms and gene sets**

|                    | All   | Catalytic activity<br>GO:0003824 | Metabolic process<br>GO:0008152 | Mult. org. developmental<br>GO:0007275 | Transcription reg. activity<br>GO:0030528 | CDY set <sup>a</sup> | HK set <sup>a</sup> | Complex set <sup>a</sup> |
|--------------------|-------|----------------------------------|---------------------------------|----------------------------------------|-------------------------------------------|----------------------|---------------------|--------------------------|
| All                | 14703 | 3292                             | 4231                            | 1271                                   | 421                                       | 1233                 | 601                 | 257                      |
| Duplicates         | 8664  | 2686                             | 3230                            | 993                                    | 337                                       | 653                  | 401                 | 234                      |
| TDGs               | 2952  | 953                              | 1132                            | 256                                    | 112                                       | 54                   | 42                  | 56                       |
| non TDGs           | 4784  | 1436                             | 1723                            | 569                                    | 180                                       | 529                  | 307                 | 117                      |
| conserved TDGs     | 400   | 125                              | 152                             | 86                                     | 40                                        | 18                   | 8                   | 21                       |
| non conserved TDGs | 2552  | 828                              | 980                             | 170                                    | 72                                        | 36                   | 34                  | 35                       |

<sup>a</sup> Data obtained from Nelson et al. (2004).
