# Supplementary material for: Selective maintenance of Drosophila tandemly arranged duplicated genes during evolution
Source: PubMed Central journal article supplement (PMC2646280; doi:10.1186/gb-2008-9-12-r176), 2008-12-16
Supplement: gb-2008-9-12-r176-S8.pdf [file gb-2008-9-12-r176-S8.pdf]

## Additional Table 5

### Groups of TDGs conserved between *D. melanogaster* and *A. gambiae* used in the embryonic co-expression analysis

#### 1. Groups showing co-expression

| n° co-expressed genes /n° genes in group* | site of co-expression                | *genes in group for which in situ hybridization in the early embryo has been performed |
|-------------------------------------------|--------------------------------------|----------------------------------------------------------------------------------------|
| 2/2                                       | anterior ectoderm                    | CG14888 CG14889                                                                        |
| 2/2                                       | posterior segments                   | CG10388 CG10325                                                                        |
| 2/2                                       | segment-polarity                     | CG9015 CG17835                                                                         |
| 2/2                                       | segment-polarity                     | CG3388 CG2692                                                                          |
| 2/2                                       | pharynx, hindgut                     | CG31121 CG11069                                                                        |
| 2/2                                       | anterior and posterior endoderm      | CG3992 CG10278                                                                         |
| 2/2                                       | ventral nerve cord and brain         | CG1130 CG12605                                                                         |
| 2/2                                       | muscle precursors                    | CG7895 CG7902                                                                          |
| 2/2                                       | ventral ectoderm and procephalon     | CG12094 CG12102                                                                        |
| 2/2                                       | ventral nerve cord and brain         | CG12236 CG3726                                                                         |
| 2/2                                       | pharynx, posterior spiracles         | CG5812 CG14254                                                                         |
| 2/2                                       | segment-polarity                     | CG4889 CG4698                                                                          |
| 2/2                                       | fore- and hindgut, epidermis         | CG8303 CG8306                                                                          |
| 2/2                                       | foregut and pharynx                  | CG9261 CG9258                                                                          |
| 2/3                                       | pharynx, hindgut and tracheal system | CG4590 CG3039 CG2977                                                                   |
| 3/3                                       | segment-polarity                     | CG3851 CG10016 CG3242                                                                  |
| 3/3                                       | fat body                             | CG3829 CG2727 CG2736                                                                   |
| 3/4                                       | large intestine                      | CG6921 CG33110 CG5278 CG5326                                                           |
| 4/5                                       | esophagus, ventral epidermis         | CG1155 CG1154 CG15592 CG1151 CG1153                                                    |

## 2. Groups with no evidence for co-expression

| Genes in group for which in situ hybridization in the early embryo has been performed |
|---------------------------------------------------------------------------------------|
| CG31522 CG31523                                                                       |
| CG7675 CG31235                                                                        |
| CG18754 CG16705                                                                       |
| CG16876 CG33119                                                                       |
| CG5820 CG5819                                                                         |
| CG1124 CG2016                                                                         |
| CG4322 CG4313                                                                         |
| CG8502 CG8505                                                                         |
| CG5171 CG5177                                                                         |
| CG15095 CG15094                                                                       |
| CG1915 CG1140                                                                         |
| CG7186 CG7597                                                                         |
| CG10462 CG10366                                                                       |
| CG33133 CG10543                                                                       |
| CG11670 CG11668                                                                       |
| CG12653 CG1343                                                                        |
| CG1213 CG1208                                                                         |
| CG5486 CG5505                                                                         |
| CG4914 CG7924                                                                         |
| CG9171 CG11149                                                                        |
| CG6824 CG32767                                                                        |
| CG8595 CG11099                                                                        |
| CG4746 CG4766                                                                         |
| CG9366 CG9375                                                                         |
| CG7526 CG32373                                                                        |
| CG1102 CG14642                                                                        |
| CG11824 CG8170                                                                        |
| CG10026 CG10237                                                                       |
| CG17359 CG17361                                                                       |
| CG15002 CG1299 CG14990                                                                |
| CG8034 CG8062 CG8051                                                                  |
| CG11228 CG10023 CG8201                                                                |
| CG1264 CG1046 CG1034 CG1028 CG1048                                                    |
