# Supplementary material for: Selective maintenance of Drosophila tandemly arranged duplicated genes during evolution
Source: PubMed Central journal article supplement (PMC2646280; doi:10.1186/gb-2008-9-12-r176), 2008-12-16
Supplement: gb-2008-9-12-r176-S9.pdf [file gb-2008-9-12-r176-S9.pdf]

## Additional Table 6

Groups of genes in conserved linkage between *D. melanogaster* and *A. gambiae* that are not tandem duplicates used in the embryonic co-expression analysis

### 1. Groups showing co-expression

| n° co-expressed genes /n° genes in group* | site of co-expression | *genes in group for which in situ hybridization in the early embryo has been performed |
|-------------------------------------------|-----------------------|----------------------------------------------------------------------------------------|
| 2/2                                       | midgut                | CG7266 CG7841                                                                          |
| 2/2                                       | midgut                | CG12238 CG14222                                                                        |
| 2/2                                       | anal pad, pharynx     | CG10002 CG9990                                                                         |
| 2/2                                       | anterior midgut       | CG9300 CG9231                                                                          |
| 2/2                                       | foregut, hindgut      | CG17271 CG17272                                                                        |
| 2/3                                       | midgut                | CG7129 CG18600 CG8064                                                                  |
| 2/3                                       | midgut                | CG1910 CG2245 CG2150                                                                   |
| 2/3                                       | midgut                | CG6769 CG8142 CG6474                                                                   |
| 2/3                                       | midgut                | CG6463 CG6404 CG32067                                                                  |
| 2/3                                       | midgut                | CG5645 CG9762 CG5638                                                                   |
| 2/3                                       | midgut                | CG1753 CG1742 CG32512                                                                  |
| 2/3                                       | visceral muscle       | CG5595 CG5588 CG5596                                                                   |
| 2/4                                       | midgut                | CG13850 CG13852 CG13848 CG13849                                                        |
| 2/4                                       | midgut                | CG1771 CG1591 CG4332 CG12096                                                           |
| 2/4                                       | midgut                | CG8443 CG8445 CG8440 CG8441                                                            |
| 2/4                                       | anterior midgut       | CG8625 CG8646 CG8632 CG8785                                                            |
| 3/4                                       | midgut                | CG9175 CG13993 CG9140 CG9154                                                           |
| 3/4                                       | midgut                | CG10535 CG17358 CG14715 CG14721                                                        |
| 3/4                                       | midgut                | CG3297 CG13466 CG5114 CG17166                                                          |
| 3/5                                       | midgut                | CG4299 CG4307 CG6476 CG6363 CG6623                                                     |
| 2/6                                       | anal pad              | CG4675 CG13784 CG5160 CG4567 CG5125 CG4502                                             |
| 2/7                                       | midgut                | CG31043 CG5452 CG5454 CG6009 CG6013 CG6011 CG5451                                      |
| 2/7                                       | midgut                | CG18250 CG8314 CG8386 CG8416 CG8320 CG8418 CG8405                                      |

|      |                                              |                                                                                             |
|------|----------------------------------------------|---------------------------------------------------------------------------------------------|
| 2/7  | anal pad                                     | CG13624 CG13633 CG17780 CG13618 CG10693 CG6593 CG5796                                       |
| 3/7  | midgut                                       | CG18408 CG33183 CG1371 CG1381 CG1407 CG4001 CG12920                                         |
| 2/8  | midgut                                       | CG3424 CG32037 CG4035 CG3431 CG3408 CG3434 CG4080 CG3654                                    |
| 2/8  | midgut, muscle, ventrolateral sensory system | CG5461 CG17218 CG5442 CG5446 CG5525 CG5435 CG6388 CG6405                                    |
| 5/8  | midgut                                       | CG3409 CG3265 CG3403 CG3283 CG3268 CG3287 CG3420 CG3427                                     |
| 3/9  | midgut                                       | CG2666 CG32464 CG12746 CG2663 CG2161 CG2669 CG12005 CG14670 CG1172                          |
| 4/9  | tracheal system                              | CG10287 CG15188 CG1157 CG1148 CG15598 CG1169 CG1150 CG1147 CG10303                          |
| 2/10 | midgut, sensory system                       | CG14026 CG14039 CG14041 CG3792 CG8849 CG18174 CG8891 CG31660 CG3887 CG9124                  |
| 3/10 | midgut                                       | CG17492 CG10689 CG10446 CG10699 CG10449 CG10691 CG10655 CG10653 CG15173 CG10563             |
| 4/10 | midgut                                       | CG31607 CG7149 CG8486 CG31605 CG7109 CG8552 CG7111 CG14536 CG7102 CG7221                    |
| 2/11 | midgut                                       | CG10596 CG5249 CG17334 CG4769 CG10541 CG10640 CG4623 CG10626 CG13704 CG10672 CG7499         |
| 3/11 | midgut                                       | CG10627 CG10686 CG10698 CG10660 CG10682 CG10426 CG10646 CG4153                              |
| 2/12 | midgut                                       | CG6822 CG32354 CG5989 CG32029 CG7062 CG6765 CG6745 CG6416 CG7207 CG7201 CG5962 CG7037       |
| 4/13 | midgut                                       | CG9704 CG9710 CG9706 CG9705 CG9677 CG4169 CG3971 CG9712 CG4097 CG4086 CG4109 CG13024 CG3849 |

## 2. Groups with no evidence for co-expression

| Genes in group for which in situ hybridization in the early embryo has been performed |
|---------------------------------------------------------------------------------------|
| CG1471 CG2139                                                                         |
| CG15669 CG9847                                                                        |
| CG2718 CG2674                                                                         |
| CG31431 CG6569                                                                        |
| CG7724 CG7725                                                                         |
| CG8583 CG8593                                                                         |
| CG32549 CG6106                                                                        |
| CG7758 CG10512                                                                        |
| CG13424 CG13432                                                                       |
| CG10207 CG10212                                                                       |

|                 |
|-----------------|
| CG7870 CG7818   |
| CG7720 CG12345  |
| CG4978 CG4999   |
| CG1441 CG2346   |
| CG9670 CG9614   |
| CG1119 CG31536  |
| CG7470 CG11523  |
| CG31175 CG31221 |
| CG33138 CG4016  |
| CG17124 CG6495  |
| CG1539 CG2239   |
| CG2679 CG16778  |
| CG8205 CG8207   |
| CG9322 CG9297   |
| CG1486 CG1685   |
| CG13209 CG12390 |
| CG4082 CG14683  |
| CG14655 CG17735 |
| CG13606 CG6198  |
| CG12026 CG13937 |
| CG7970 CG7977   |
| CG11966 CG11967 |
| CG31264 CG31369 |
| CG7839 CG6272   |
| CG31108 CG13650 |
| CG3962 CG5184   |
| CG3246 CG12795  |
| CG4654 CG4643   |
| CG9972 CG1066   |
| CG8733 CG8548   |
| CG3664 CG9886   |
| CG32982 CG9586  |
| CG5946 CG7283   |
| CG3860 CG3105   |

|                        |
|------------------------|
| CG15887 CG8449         |
| CG3520 CG3530          |
| CG8740 CG8739          |
| CG8603 CG8553          |
| CG17600 CG17598        |
| CG6619 CG6610          |
| CG33174 CG10997        |
| CG6767 CG8284          |
| CG18809 CG12534        |
| CG11326 CG17378        |
| CG6438 CG6420          |
| CG6199 CG32076         |
| CG11271 CG11268        |
| CG6625 CG6597          |
| CG9149 CG2277          |
| CG32372 CG7546         |
| CG3522 CG13588         |
| CG7807 CG32438         |
| CG8965 CG7238          |
| CG14968 CG17737        |
| CG31216 CG6195         |
| CG5502 CG4980          |
| CG9393 CG8228          |
| CG11660 CG7339         |
| CG10362 CG2471         |
| CG12015 CG3279         |
| CG11989 CG6674         |
| CG12220 CG12114        |
| CG11710 CG1692         |
| CG1599 CG1665          |
| CG12107 CG30496        |
| CG6287 CG6320          |
| CG14704 CG5276         |
| CG2184 CG15529 CG31028 |

|                         |
|-------------------------|
| CG5545 CG6433 CG6412    |
| CG7997 CG8048 CG4311    |
| CG9984 CG4239 CG4394    |
| CG11661 CG3764 CG9665   |
| CG3497 CG3994 CG15270   |
| CG1200 CG13913 CG9122   |
| CG1152 CG10047 CG10050  |
| CG14447 CG5966 CG5928   |
| CG7005 CG7012 CG7006    |
| CG7011 CG6869 CG6876    |
| CG8759 CG8766 CG12373   |
| CG33323 CG10068 CG31248 |
| CG13969 CG10756 CG10757 |
| CG11128 CG11115 CG10712 |
| CG31323 CG14543 CG6154  |
| CG9351 CG9374 CG14367   |
| CG31757 CG14940 CG14939 |
| CG3910 CG3909 CG11722   |
| CG6459 CG30105 CG10933  |
| CG7399 CG8492 CG7391    |
| CG18654 CG14764 CG14763 |
| CG11561 CG11617 CG3645  |
| CG5248 CG6949 CG6958    |
| CG5641 CG5266 CG5844    |
| CG1782 CG1776 CG18345   |
| CG1759 CG9318 CG9324    |
| CG17265 CG3542 CG17258  |
| CG9554 CG9526 CG9542    |
| CG7920 CG7921 CG7903    |
| CG2078 CG1968 CG1975    |
| CG8938 CG6953 CG6984    |
| CG12230 CG14217 CG33525 |
| CG30427 CG2765 CG3760   |
| CG5422 CG33100 CG6147   |

|                                         |
|-----------------------------------------|
| CG10938 CG4798 CG6550                   |
| CG30118 CG5186 CG5190                   |
| CG4778 CG4839 CG4758                    |
| CG11136 CG8994 CG11132                  |
| CG6965 CG31368 CG14724                  |
| CG8024 CG8026 CG8055                    |
| CG8912 CG5935 CG8905                    |
| CG11887 CG12338 CG12341                 |
| CG1344 CG10465 CG10417 CG10395          |
| CG5064 CG5068 CG5651 CG4911             |
| CG7265 CG3731 CG7281 CG33332            |
| CG3510 CG30092 CG9952 CG30271           |
| CG12758 CG15097 CG15084 CG15081         |
| CG31670 CG7337 CG31665 CG31663          |
| CG4133 CG4063 CG4164 CG4033             |
| CG11241 CG11370 CG11367 CG6838          |
| CG11295 CG5472 CG5411 CG9850            |
| CG6281 CG3999 CG6217 CG6293             |
| CG13037 CG16807 CG4672 CG4561           |
| CG3048 CG4104 CG2960 CG3702             |
| CG9653 CG9657 CG1643 CG8300             |
| CG1440 CG11202 CG2151 CG10964           |
| CG2054 CG13922 CG13921 CG12023          |
| CG1225 CG32344 CG32343 CG7008           |
| CG5130 CG6020 CG5955 CG5047             |
| CG3938 CG3903 CG4152 CG13240            |
| CG6188 CG6174 CG14395 CG17369 CG6019    |
| CG10371 CG10230 CG10370 CG10221 CG10365 |
| CG13387 CG13391 CG17292 CG13390 CG13398 |
| CG3074 CG10382 CG5799 CG3425 CG3045     |
| CG4710 CG4385 CG4552 CG5041 CG4749      |
| CG3722 CG15651 CG30295 CG10540 CG9344   |
| CG11024 CG14021 CG7382 CG14022 CG7371   |
| CG14830 CG8615 CG8614 CG8610 CG8616     |

|                                                                                                                     |
|---------------------------------------------------------------------------------------------------------------------|
| CG3385 CG3376 CG3401 CG3394 CG3318 CG30418                                                                          |
| CG1897 CG14509 CG14516 CG11500 CG14507 CG11899                                                                      |
| CG17914 CG17332 CG17905 CG31991 CG13277 CG31739                                                                     |
| CG30023 CG13196 CG8991 CG7776 CG8238 CG8998                                                                         |
| CG9768 CG9779 CG1074 CG1090 CG14647 CG9766                                                                          |
| CG9256 CG1099 CG1762 CG9250 CG9339 CG9265                                                                           |
| CG7891 CG2708 CG10903 CG2767 CG9667 CG11035                                                                         |
| CG16984 CG32300 CG9018 CG8993 CG5714 CG12187                                                                        |
| CG3331 CG5802 CG3353 CG6056 CG5919 CG5862 CG5745                                                                    |
| CG1624 CG11140 CG11139 CG11127 CG30499 CG1669 CG30492                                                               |
| CG15162 CG10275 CG10338 CG10346 CG10283 CG15160 CG10343                                                             |
| CG4532 CG3184 CG3960 CG3135 CG3973 CG14444 CG3126 CG12796                                                           |
| CG15009 CG18675 CG14996 CG1308 CG14994 CG14993 CG1318 CG14995 CG1319 CG15005 CG15011 CG1309 CG11586                 |
| CG10072 CG10160 CG10064 CG9953 CG10118 CG10173 CG10107 CG32392 CG8398 CG10060 CG18769 CG33171 CG32393 CG8368 CG8631 |
